# Supplementary material for: Canine tumor mutational burden is correlated with TP53 mutation across tumor types and breeds
Source: PubMed Central journal article supplement (PMC8333103; doi:10.1038/s41467-021-24836-9), 2021-08-03
Supplement: 41467_2021_24836_MOESM3_ESM.pdf [file 41467_2021_24836_MOESM3_ESM.pdf]

## **Description of Additional Supplementary Files**

File Name: Supplementary Data 1

Description: Source, breeds, sequence quality control of published canine tumour WES and WGS data.

File Name: Supplementary Data 2

Description: Breed-specific germline base substitutions and small indels

File Name: Supplementary Data 3

Description: Canine somatic mutations, copy number alterations (CNAs), and their significance levels.

File Name: Supplementary Data 4

Description: Canonical cancer pathway genes, and human data source.

File Name: Supplementary Data 5

Description: Problematic gene list, association between TMB and gene mutations or pathway alterations, and human TMB data source.

File Name: Supplementary Data 6

Description: Canine coding and noncoding mutation signature discovery with WES and WGS data.

File Name: Supplementary Software 1

Description: Canine breed validation and prediction software v1.0.
